# Supplementary material for: Reverse intersystem crossing from high-level triplet excited electronic states of fluorescent organic molecules
Source: Royal Society of Chemistry journal article supplement (doi:10.1039/d4tc01854k), 2024-01-01
Supplement: d4tc01854k1.pdf [file d4tc01854k1.pdf]

## Supplementary Information

### Reverse Intersystem Crossing from High-Level Triplet Excited Electronic States of Fluorescent Organic Molecules

Qianqian Xu,<sup>\*a</sup> Andrew D. Scully,<sup>c</sup> Melissa Skidmore,<sup>c</sup> Hua Ke,<sup>\*d</sup> Xiaojun Wu,<sup>b</sup> Jie Li,<sup>b</sup> Zhicheng Zhang,<sup>b</sup> Xiaochang Li<sup>b</sup> and Kazunori Ueno<sup>\*b</sup>

<sup>a</sup> School of Chemistry and Materials Science, East China University of Technology, Nanchang 330013, P. R. China. E-mail: qqx\_qx@163.com

<sup>b</sup> GuanMat Optoelectronic Materials, Inc., Pingxiang 337000, P. R. China. E-mail: drkayxyzq@yahoo.co.jp

<sup>c</sup> CSIRO Manufacturing, Research Way, Clayton, Victoria, 3168, Australia

<sup>d</sup> College of Materials and Chemical Engineering, Pingxiang University, Pingxiang, Jiangxi 337055, P. R. China. E-mail: kehua\_pxu@163.com

#### Materials and methods

The <sup>1</sup>H NMR and <sup>13</sup>C NMR spectra of the following synthesized compounds are shown in Fig. S7- S18.

#### Synthesis of 1

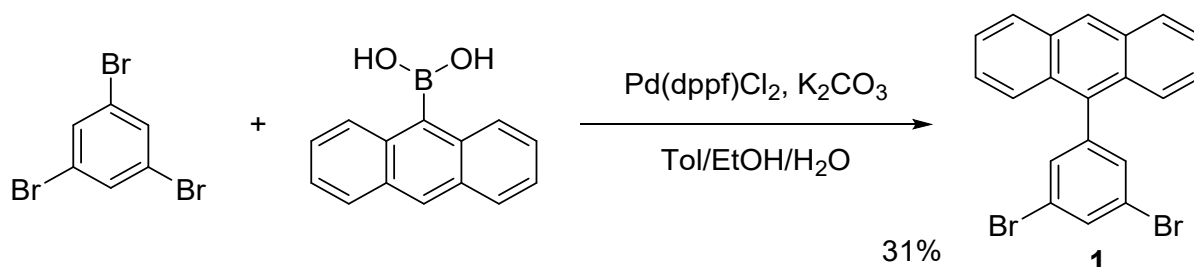

A 2 L flask was charged with 1,3,5-tribromobenzene (20 g, 63.5 mmol), 9-Anthraceneboronic acid (14.1 g, 63.5 mmol), Pd(PPh<sub>3</sub>)<sub>4</sub> (1.5 g, 1.3 mmol), K<sub>2</sub>CO<sub>3</sub> (18 g, 130.4 mmol), 105 mL toluene, 30 mL ethanol and 65 mL water. The resulting mixture was stirred for 5 h at 100 °C under N<sub>2</sub>. Then the reaction mixture was cooled to room temperature and washed with water. The organic solvent was evaporated under reduced pressure. The resulting residue was purified by column chromatography using PE-CH<sub>2</sub>Cl<sub>2</sub> (4:1) as an eluent to afford the crude product. The crude product was further purified by being washed with CH<sub>2</sub>Cl<sub>2</sub> to afford the product **1** in 31% yield with 98% purity as yellow solid.

MS *m/z* [M]<sup>+</sup> calc'd for C<sub>20</sub>H<sub>12</sub>Br<sub>2</sub>: 411.93, found: 412.10.

<sup>1</sup>H NMR (400 MHz, Chloroform-*d*) δ 8.49 (s, 1H), 8.02 (d, *J* = 8.4 Hz, 2H), 7.85 (s, 1H), 7.58 (d, *J* = 8.7 Hz, 2H), 7.52 (s, 2H), 7.46 (dd, *J* = 8.7, 6.2 Hz, 2H), 7.39 (dd, *J* = 8.8, 6.4 Hz, 2H).

<sup>13</sup>C NMR (101 MHz, Chloroform-*d*) δ 142.65, 133.40, 133.29, 133.02, 131.22, 129.94, 128.56, 127.70, 126.14, 126.04, 125.33, 123.10.

### Synthesis of **2**

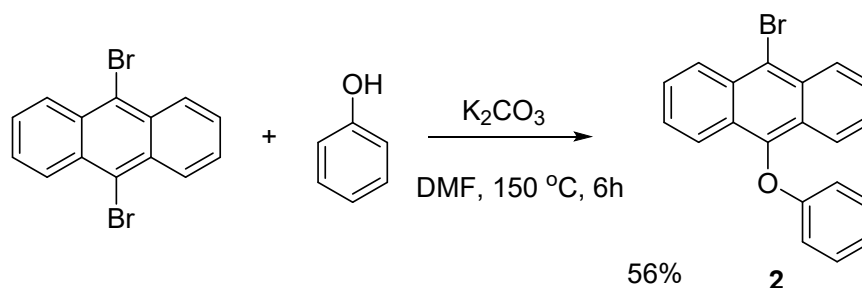

A 50 mL flask was charged with compound 9,10-dibromoanthracene (672 mg, 2.0 mmol), phenol (226 mg, 2.4 mmol), K<sub>2</sub>CO<sub>3</sub> (331 mg, 2.4 mmol). 10 mL DMF was added to the flask. The resulting reaction was allowed to proceed for 6 h at 150 °C under N<sub>2</sub>. Then the reaction mixture was cooled to room temperature and poured into 100 mL water. The precipitated solid was filtered and purified by column chromatography using petroleum ether (PE) as an eluent to afford the product **2** in 56% yield as yellow solid.

MS *m/z* [M]<sup>+</sup> calc'd for C<sub>20</sub>H<sub>13</sub>BrO: 348.02, found: 348.53.

$^1\text{H}$  NMR (400 MHz, Chloroform- $d$ )  $\delta$  8.56 (d,  $J$  = 8.9 Hz, 2H), 8.11 (d,  $J$  = 8.7 Hz, 2H), 7.58 (ddd,  $J$  = 8.9, 6.5, 1.2 Hz, 2H), 7.43 (ddd,  $J$  = 8.7, 6.5, 1.1 Hz, 2H), 7.28 – 7.14 (m, 2H), 6.98 (t,  $J$  = 7.3 Hz, 1H), 6.86 – 6.75 (m, 2H).

$^{13}\text{C}$  NMR (100 MHz, Chloroform- $d$ )  $\delta$  159.94, 145.81, 131.08, 129.79, 127.92, 127.51, 126.15, 125.60, 122.89, 121.97, 118.92, 115.25.

### Synthesis of **3**

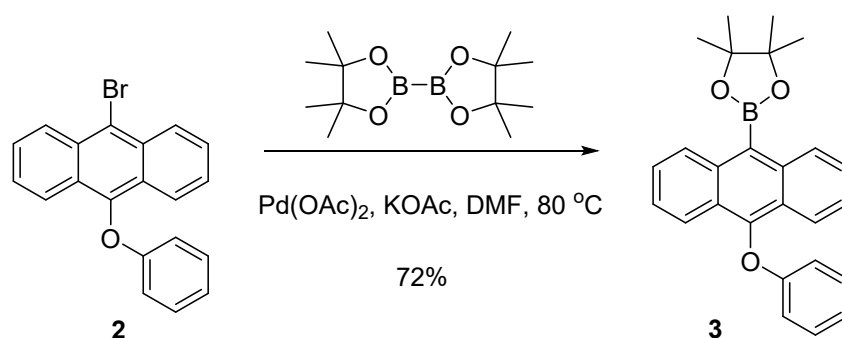

A 250 ml flask was charged with compound **2** (3.49 g, 10 mmol), bis(pinacolato)diboron (3.05 g, 12 mmol),  $\text{Pd}(\text{OAc})_2$  (112 mg, 0.5 mmol), KOAc (2.94 g, 30 mmol) and DMF (40 mL). The resulting mixture was stirred for 16 h at  $80\text{ }^\circ\text{C}$  under  $\text{N}_2$ . Then the reaction mixture was cooled to room temperature and poured into 400 mL water. The resulting mixture was filtered and the residue was purified by column chromatography using PE- $\text{CH}_2\text{Cl}_2$  (4:1) as an eluent to afford the product **3** in 72% yield as yellow solid.

MS  $m/z$   $[\text{M}]^+$  calc'd for  $\text{C}_{26}\text{H}_{25}\text{BO}_3$ : 396.19, found: 396.06.

$^1\text{H}$  NMR (400 MHz, Chloroform- $d$ )  $\delta$  8.50 (d,  $J$  = 9.0 Hz, 2H), 8.12 (d,  $J$  = 8.8 Hz, 2H), 7.48 (dd, 2H), 7.38 (dd,  $J$  = 8.8, 6.4 Hz, 2H), 7.24 – 7.15 (m, 2H), 6.99 – 6.92 (m, 1H), 6.82 – 6.75 (m, 2H), 1.58 (s, 12H).

$^{13}\text{C}$  NMR (100 MHz, Chloroform- $d$ )  $\delta$  160.14, 147.73, 136.88, 129.74, 128.62, 127.26, 126.19, 125.52, 124.46, 122.87, 121.76, 115.36, 84.56, 25.24.

## Synthesis of DPOTAB

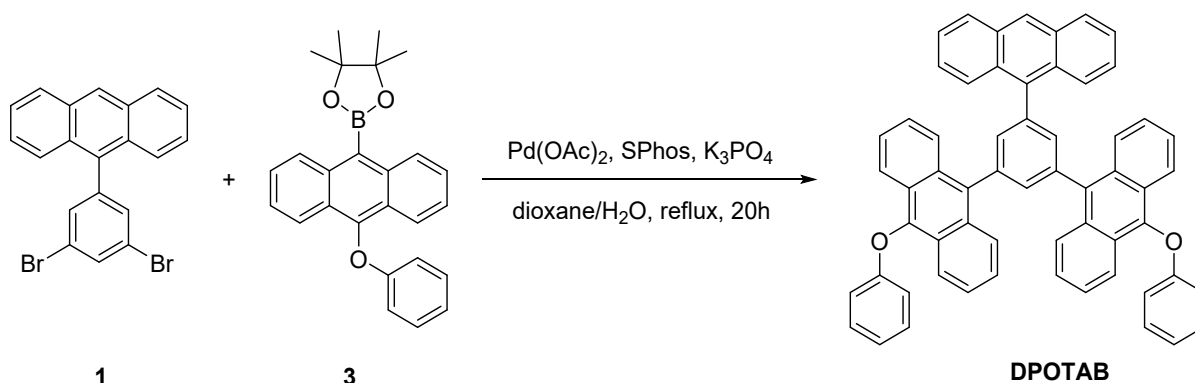

A 250 ml flask was charged with compound **1** (2.551 g, 6.20 mmol), compound **3** (5.885 g, 14.86 mmol), Pd(OAc)<sub>2</sub> (70 mg, 0.31 mmol), SPhos (383 mg, 0.93 mmol), K<sub>3</sub>PO<sub>4</sub> (13.144 g, 62 mmol) and 60 ml dioxane-H<sub>2</sub>O (5:1). The flask was evacuated and refilled with N<sub>2</sub> for 3 times, and then the reaction mixture was stirred for 24 h under reflux condition. Then the reaction mixture was cooled to room temperature and evaporated under reduced pressure to remove the organic solvent. Then 100 ml water was added to the residue and the resulting mixture was extracted with CH<sub>2</sub>Cl<sub>2</sub> (60 ml × 3). The organic layer was combined and evaporated under reduced pressure, and the residue was purified by column chromatography using PE-CH<sub>2</sub>Cl<sub>2</sub> (4:1) as an eluent to afford the crude product in 60% yield as yellow solid. The crude product was further purified by vigorously stirring with PE, removing the solvent then vigorously stirring with CH<sub>2</sub>Cl<sub>2</sub>. Next, the product was recrystallized with toluene and then recrystallized with DMF to afford the pure product **DPOTAB** in 99.8% purity.

MS *m/z* [M]<sup>+</sup> calc'd for C<sub>60</sub>H<sub>38</sub>O<sub>2</sub>: 790.29, found: 790.20.

<sup>1</sup>H NMR (400 MHz, Chloroform-*d*) δ 8.51 (s, 1H), 8.27 – 8.14 (m, 10H), 8.06 (d, *J* = 8.4 Hz, 2H), 7.87 – 7.81 (m, 3H), 7.56 (dd, *J* = 8.8, 6.5 Hz, 6H), 7.45 (dd, *J* = 9.1, 5.8 Hz, 6H), 7.26 – 7.17 (m, 4H), 6.97 (t, *J* = 7.4 Hz, 2H), 6.85 (d, *J* = 8.1 Hz, 4H).

<sup>13</sup>C NMR (101 MHz, Chloroform-*d*) δ 160.21, 145.63, 139.17, 138.85, 136.07, 134.13, 134.02, 133.83, 131.49, 131.07, 130.33, 129.79, 128.67, 127.09, 126.88, 126.56, 126.14, 125.89, 125.70, 125.20, 124.63, 122.76, 121.80, 115.33.

## Synthesis of 4

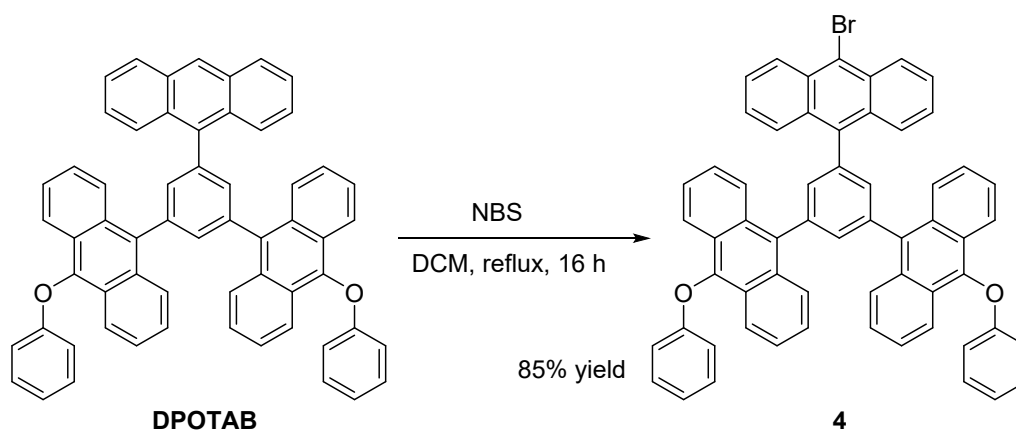

To a stirred solution of DPOTAB (2.96 g, 3.74 mmol) in DCM (12 mL) under reflux was slowly added a DCM solution (8 mL) of NBS (1.665 g, 9.36 mmol), then the reaction was allowed to proceed for 16 h under reflux condition. After the completed, the solvent was removed under reduced pressure, and the resulting residue was purified by silica gel column chromatography (PE/DCM = 5/1) to afford compound **4** 2.76 g in 85% yield as yellowish green solid.

MS  $m/z$   $[M]^+$  calc'd for  $C_{60}H_{37}BrO_2$ : 868.20, found: 867.98.

$^1H$  NMR (400 MHz, Chloroform- $d$ )  $\delta$  8.68 – 8.61 (m, 2H), 8.26 – 8.15 (m, 10H), 7.88 (t,  $J$  = 1.6 Hz, 1H), 7.81 (d,  $J$  = 1.7 Hz, 2H), 7.69 – 7.53 (m, 8H), 7.46 (ddd,  $J$  = 8.7, 6.6, 1.1 Hz, 4H), 7.24 – 7.18 (m, 4H), 7.02 – 6.94 (m, 2H), 6.89 – 6.81 (m, 4H).

$^{13}C$  NMR (101 MHz, Chloroform- $d$ )  $\delta$  160.23, 145.73, 139.00, 138.85, 136.87, 134.52, 133.96, 133.62, 131.16, 131.08, 130.42, 129.87, 128.28, 127.15, 127.13, 126.82, 126.28, 126.20, 125.80, 124.68, 123.36, 122.87, 121.89, 115.38.

### Synthesis of DPOTABCN

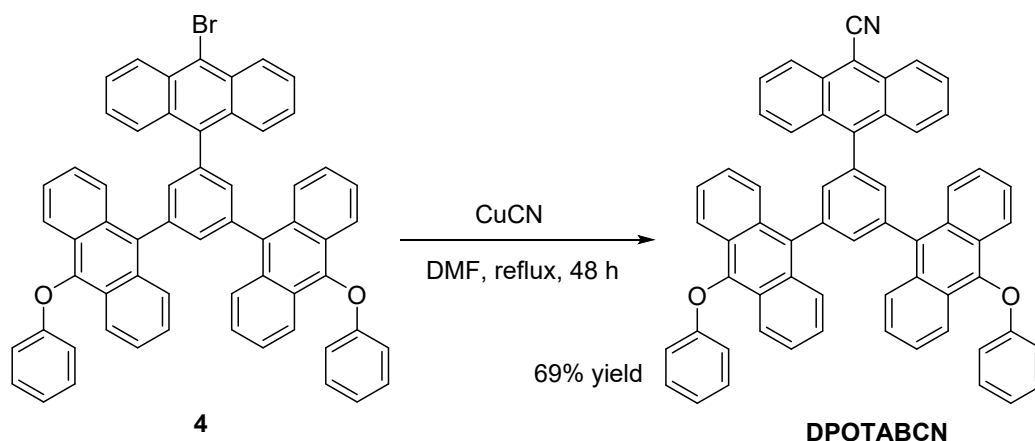

A 50 ml flask was charged with compound **4** (1.4 g, 1.6 mmol), CuCN (288 mg, 3.2 mmol) and DMF (10 mL), the resulting mixture was stirred at 156 °C under N<sub>2</sub> atmosphere for 48 h. After the reaction completed, the reaction mixture was cooled to room temperature, and poured into 100 mL ice water. Then the precipitate was collected by filtration and purified by silica gel column chromatography (PE/DCM = 3/1) to afford **DPOTABCN** 900 mg in 69% yield as a light green solid.

MS  $m/z$  [M]<sup>+</sup> calc'd for C<sub>61</sub>H<sub>37</sub>NO<sub>2</sub>: 815.28, found: 815.26.

<sup>1</sup>H NMR (400 MHz, Chloroform-d)  $\delta$  8.57 – 8.48 (m, 2H), 8.27 (dt, J = 8.7, 1.1 Hz, 2H), 8.22 – 8.16 (m, 8H), 7.92 (t, J = 1.6 Hz, 1H), 7.80 (d, J = 1.6 Hz, 2H), 7.76 (ddd, J = 8.6, 6.6, 1.2 Hz, 2H), 7.69 (ddd, J = 8.8, 6.7, 1.3 Hz, 2H), 7.58 (ddd, J = 8.7, 6.6, 1.3 Hz, 4H), 7.46 (ddd, J = 8.9, 6.6, 1.1 Hz, 4H), 7.27 – 7.17 (m, 4H), 7.02 – 6.94 (m, 2H), 6.89 – 6.80 (m, 4H).

<sup>13</sup>C NMR (101 MHz, Chloroform-d)  $\delta$  160.20, 145.87, 142.83, 139.25, 137.79, 135.02, 133.45, 133.25, 133.21, 131.06, 129.88, 129.79, 128.85, 127.57, 126.91, 126.64, 126.40, 125.88, 125.84, 124.67, 122.95, 121.94, 117.56, 115.36, 106.16.

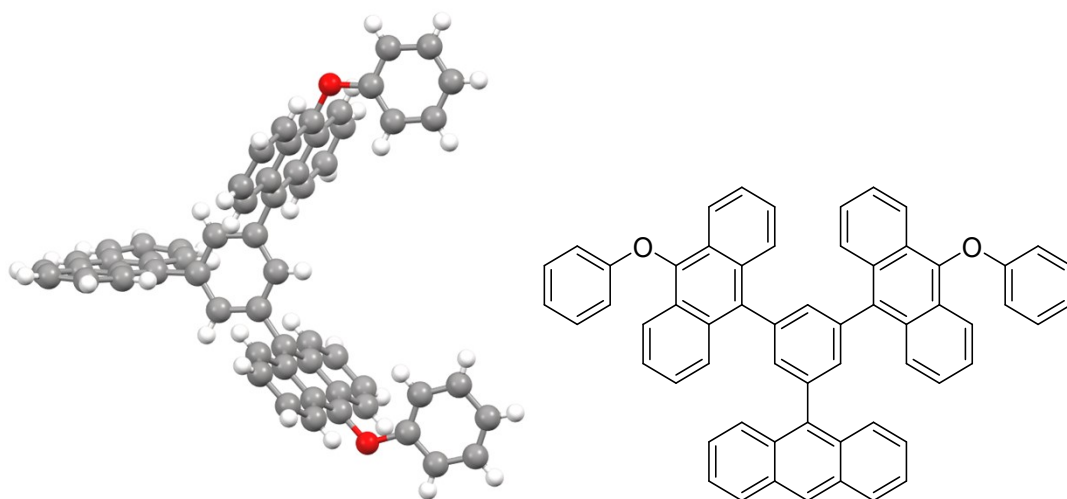

**Figure S1.** Single Crystal X-Ray Diffraction of DPOTAB (CCDC: 2294880).

***Crystal structure determination of DPOTAB***

**Crystal Data** for  $C_{60}H_{38}O_2$  ( $M = 790.90$  g/mol): triclinic, space group P-1 (no. 2),  $a = 10.7846(2)$  Å,  $b = 16.2789(4)$  Å,  $c = 16.8851(4)$  Å,  $\alpha = 104.238(2)^\circ$ ,  $\beta = 104.743(2)^\circ$ ,  $\gamma = 95.002(2)^\circ$ ,  $V = 2743.02(12)$  Å<sup>3</sup>,  $Z = 2$ ,  $T = 293(2)$  K,  $\mu(\text{CuK}\alpha) = 0.439$  mm<sup>-1</sup>,  $D_{\text{calc}} = 0.958$  g/cm<sup>3</sup>, 36433 reflections measured ( $5.634^\circ \leq 2\theta \leq 150.206^\circ$ ), 10880 unique ( $R_{\text{int}} = 0.0513$ ,  $R_{\text{sigma}} = 0.0540$ ) which were used in all calculations. The final  $R_1$  was 0.1976 ( $I > 2\sigma(I)$ ) and  $wR_2$  was 0.5173 (all data).

**Table S1.** Crystal data and structure refinement for DPOTAB

|                                             |                                                                |
|---------------------------------------------|----------------------------------------------------------------|
| Identification code                         | DPOTAB                                                         |
| Empirical formula                           | C <sub>60</sub> H <sub>38</sub> O <sub>2</sub>                 |
| Formula weight                              | 790.90                                                         |
| Temperature/K                               | 293(2)                                                         |
| Crystal system                              | triclinic                                                      |
| Space group                                 | P-1                                                            |
| a/Å                                         | 10.7846(2)                                                     |
| b/Å                                         | 16.2789(4)                                                     |
| c/Å                                         | 16.8851(4)                                                     |
| α/°                                         | 104.238(2)                                                     |
| β/°                                         | 104.743(2)                                                     |
| γ/°                                         | 95.002(2)                                                      |
| Volume/Å <sup>3</sup>                       | 2743.02(12)                                                    |
| Z                                           | 2                                                              |
| ρ <sub>calc</sub> /cm <sup>3</sup>          | 0.958                                                          |
| μ/mm <sup>-1</sup>                          | 0.439                                                          |
| F(000)                                      | 828.0                                                          |
| Radiation                                   | CuKα (λ = 1.54184)                                             |
| 2Θ range for data collection/°              | 5.634 to 150.206                                               |
| Index ranges                                | -13 ≤ h ≤ 12, -20 ≤ k ≤ 20, -19 ≤ l ≤ 21                       |
| Reflections collected                       | 36433                                                          |
| Independent reflections                     | 10880 [R <sub>int</sub> = 0.0513, R <sub>sigma</sub> = 0.0540] |
| Data/restraints/parameters                  | 10880/0/559                                                    |
| Goodness-of-fit on F <sup>2</sup>           | 1.909                                                          |
| Final R indexes [I>=2σ (I)]                 | R <sub>1</sub> = 0.1976, wR <sub>2</sub> = 0.4492              |
| Final R indexes [all data]                  | R <sub>1</sub> = 0.2422, wR <sub>2</sub> = 0.5173              |
| Largest diff. peak/hole / e Å <sup>-3</sup> | 1.14/-0.59                                                     |



**Table S2.** Fractional Atomic Coordinates ( $\times 10^4$ ) and Equivalent Isotropic Displacement Parameters ( $\text{\AA}^2 \times 10^3$ ) for DPOTAB.  $U_{\text{eq}}$  is defined as 1/3 of the trace of the orthogonalized  $U_{ij}$  tensor.

| Atom | <i>x</i> | <i>y</i> | <i>z</i> | $U(\text{eq})$ |
|------|----------|----------|----------|----------------|
| C34  | 1520(4)  | 1078(3)  | 322(3)   | 49.9(10)       |
| C29  | 867(4)   | 582(3)   | -539(3)  | 50.1(10)       |
| C21  | 896(4)   | 1690(3)  | 753(2)   | 48.0(9)        |
| C28  | -352(4)  | 710(3)   | -920(2)  | 51.5(10)       |
| O52  | 6036(4)  | 6657(3)  | 2266(2)  | 81.1(12)       |
| C15  | 1626(4)  | 2300(3)  | 1602(2)  | 50.5(10)       |
| C27  | -1016(4) | 1288(3)  | -501(3)  | 53.1(10)       |
| C22  | -372(4)  | 1782(3)  | 363(3)   | 51.7(10)       |
| C4   | 3849(5)  | 4439(3)  | 2356(3)  | 56.8(12)       |
| O35  | -988(4)  | 229(3)   | -1761(2) | 71.1(10)       |
| C5   | 5158(5)  | 4439(3)  | 2354(2)  | 56.1(11)       |
| C18  | 2356(4)  | 3048(3)  | 1607(3)  | 53.7(11)       |
| C33  | 2796(5)  | 946(4)   | 698(3)   | 61.4(12)       |
| C17  | 3056(5)  | 3644(3)  | 2361(3)  | 55.2(11)       |
| C43  | 2273(6)  | 2633(4)  | 3986(3)  | 68.4(14)       |
| C10  | 5886(5)  | 5199(4)  | 2308(3)  | 61.9(13)       |
| C11  | 5304(6)  | 5920(4)  | 2292(3)  | 67.4(15)       |
| C23  | -1065(5) | 2364(4)  | 782(3)   | 66.9(13)       |
| C30  | 1532(5)  | -24(3)   | -974(3)  | 64.7(13)       |
| C56  | 3034(5)  | 3495(3)  | 3132(3)  | 61.2(12)       |
| C19  | 2291(5)  | 2745(3)  | 3140(2)  | 58.5(12)       |
| C31  | 2741(6)  | -118(4)  | -575(4)  | 76.1(15)       |
| C6   | 5783(6)  | 3713(4)  | 2387(3)  | 69.9(14)       |
| C54  | 6574(6)  | 7575(4)  | 1501(4)  | 75.5(15)       |
| C32  | 3379(6)  | 360(4)   | 261(4)   | 76.6(15)       |
| C53  | 5922(5)  | 6801(3)  | 1474(3)  | 62.2(12)       |
| C12  | 4023(6)  | 5950(4)  | 2316(3)  | 67.7(13)       |
| C3   | 3300(5)  | 5184(3)  | 2362(3)  | 62.5(12)       |
| C26  | -2291(5) | 1405(4)  | -901(3)  | 73.2(14)       |

|     |           |          |          |          |
|-----|-----------|----------|----------|----------|
| C59 | 5162(5)   | 6454(4)  | -27(3)   | 67.4(13) |
| C57 | 6490(6)   | 7776(5)  | 737(5)   | 88.7(19) |
| C60 | 5213(5)   | 6231(4)  | 718(3)   | 65.2(13) |
| C58 | 5803(6)   | 7214(5)  | -13(4)   | 79.4(17) |
| C24 | -2298(7)  | 2447(5)  | 377(4)   | 87.8(18) |
| C44 | 1382(6)   | 3026(5)  | 4390(3)  | 80.9(18) |
| C25 | -2902(6)  | 1967(5)  | -472(4)  | 85.8(18) |
| C2  | 1986(7)   | 5223(5)  | 2380(5)  | 88.0(18) |
| C48 | 3197(7)   | 2231(5)  | 4425(3)  | 83.1(18) |
| C9  | 7198(6)   | 5165(5)  | 2268(4)  | 82.1(18) |
| C37 | -145(7)   | 1335(5)  | -2317(4) | 85.8(17) |
| C46 | 2269(8)   | 2548(6)  | 5631(4)  | 99(2)    |
| C7  | 7033(6)   | 3720(5)  | 2357(4)  | 89.0(18) |
| C8  | 7737(6)   | 4459(6)  | 2286(5)  | 97(2)    |
| C36 | -935(6)   | 609(4)   | -2411(3) | 75.8(16) |
| C13 | 3445(9)   | 6700(4)  | 2316(5)  | 94(2)    |
| C47 | 3126(9)   | 2181(5)  | 5275(4)  | 104(2)   |
| C16 | 1617(5)   | 2138(3)  | 2372(3)  | 56.3(11) |
| C45 | 1417(8)   | 2937(6)  | 5214(4)  | 100(2)   |
| C39 | -1781(8)  | 183(7)   | -3203(4) | 116(3)   |
| C51 | 468(12)   | 3381(9)  | 5605(6)  | 153(5)   |
| C38 | -94(10)   | 1682(7)  | -2959(5) | 119(3)   |
| C1  | 1474(9)   | 5951(6)  | 2370(6)  | 111(2)   |
| C14 | 2203(11)  | 6695(6)  | 2355(6)  | 119(3)   |
| C49 | 492(9)    | 3477(7)  | 4012(5)  | 119(3)   |
| C40 | -1782(15) | 509(11)  | -3868(6) | 160(5)   |
| C50 | -371(16)  | 3857(13) | 4409(7)  | 204(8)   |
| C70 | 5031(17)  | 1460(13) | 5362(8)  | 210(9)   |
| C20 | 4120(10)  | 1896(7)  | 4103(5)  | 123(3)   |
| C41 | 4127(14)  | 1761(10) | 5713(7)  | 161(5)   |
| C42 | -986(16)  | 1245(12) | -3766(7) | 163(6)   |
| C52 | -318(17)  | 3838(15) | 5208(8)  | 222(9)   |
| C55 | 5029(15)  | 1500(13) | 4570(8)  | 194(7)   |

**Table S3.** Anisotropic Displacement Parameters ( $\text{\AA}^2 \times 10^3$ ) for DPOTAB. The Anisotropic displacement factor exponent takes the form:  $-2\pi^2[h^2a^*2U_{11}+2hka^*b^*U_{12}+\dots]$ .

| Atom | $U_{11}$ | $U_{22}$ | $U_{33}$ | $U_{23}$ | $U_{13}$ | $U_{12}$ |
|------|----------|----------|----------|----------|----------|----------|
| C34  | 51(2)    | 55(2)    | 44(2)    | 14.1(18) | 16.3(17) | -3.5(18) |
| C29  | 57(2)    | 50(2)    | 42(2)    | 7.2(17)  | 19.9(18) | -2.4(18) |
| C21  | 50(2)    | 54(2)    | 36.6(19) | 8.8(17)  | 12.8(17) | -4.6(18) |
| C28  | 56(2)    | 55(3)    | 32.7(18) | 7.2(17)  | 5.3(17)  | -8.1(19) |
| O52  | 115(3)   | 68(2)    | 43.2(17) | 12.8(15) | 11.9(18) | -35(2)   |
| C15  | 50(2)    | 59(3)    | 34.7(19) | 8.9(17)  | 7.7(16)  | -6.7(18) |
| C27  | 52(2)    | 56(3)    | 45(2)    | 12.8(19) | 7.9(18)  | 1.9(19)  |
| C22  | 60(3)    | 54(3)    | 38(2)    | 12.6(18) | 10.5(18) | 1.5(19)  |
| C4   | 71(3)    | 59(3)    | 35(2)    | 8.7(18)  | 18.0(19) | -12(2)   |
| O35  | 79(2)    | 74(2)    | 45.1(17) | 0.0(15)  | 12.8(15) | -1.7(18) |
| C5   | 64(3)    | 64(3)    | 32.1(19) | 6.7(18)  | 13.3(18) | -9(2)    |
| C18  | 65(3)    | 54(3)    | 37.6(19) | 9.7(17)  | 17.3(18) | -10(2)   |
| C33  | 52(2)    | 74(3)    | 57(3)    | 18(2)    | 16(2)    | 1(2)     |
| C17  | 68(3)    | 54(3)    | 42(2)    | 13.0(18) | 20.6(19) | -8(2)    |
| C43  | 85(3)    | 76(3)    | 35(2)    | 17(2)    | 11(2)    | -15(3)   |
| C10  | 68(3)    | 70(3)    | 37(2)    | 14(2)    | 7.0(19)  | -16(2)   |
| C11  | 92(4)    | 62(3)    | 38(2)    | 7(2)     | 19(2)    | -25(3)   |
| C23  | 76(3)    | 68(3)    | 54(3)    | 7(2)     | 20(2)    | 21(3)    |
| C30  | 74(3)    | 59(3)    | 61(3)    | 6(2)     | 31(2)    | 2(2)     |
| C56  | 76(3)    | 61(3)    | 36(2)    | 8.0(18)  | 13.0(19) | -19(2)   |
| C19  | 70(3)    | 66(3)    | 31.6(19) | 13.1(18) | 9.1(18)  | -13(2)   |
| C31  | 79(4)    | 75(4)    | 85(4)    | 15(3)    | 46(3)    | 19(3)    |
| C6   | 76(3)    | 75(4)    | 53(3)    | 12(2)    | 17(2)    | 4(3)     |
| C54  | 77(3)    | 77(4)    | 64(3)    | 25(3)    | 12(2)    | -25(3)   |
| C32  | 57(3)    | 95(4)    | 80(4)    | 21(3)    | 26(3)    | 16(3)    |
| C53  | 72(3)    | 66(3)    | 48(2)    | 19(2)    | 17(2)    | -8(2)    |
| C12  | 92(4)    | 61(3)    | 46(2)    | 14(2)    | 18(2)    | -2(3)    |
| C3   | 75(3)    | 64(3)    | 49(2)    | 13(2)    | 24(2)    | -1(2)    |
| C26  | 65(3)    | 90(4)    | 54(3)    | 20(3)    | -1(2)    | 13(3)    |

|     |         |         |        |          |          |         |
|-----|---------|---------|--------|----------|----------|---------|
| C59 | 71(3)   | 85(4)   | 44(2)  | 16(2)    | 14(2)    | 7(3)    |
| C57 | 87(4)   | 91(4)   | 98(5)  | 43(4)    | 38(4)    | -13(3)  |
| C60 | 77(3)   | 62(3)   | 52(2)  | 13(2)    | 19(2)    | -3(2)   |
| C58 | 79(4)   | 105(5)  | 76(4)  | 44(3)    | 41(3)    | 16(3)   |
| C24 | 84(4)   | 94(5)   | 85(4)  | 18(3)    | 24(3)    | 37(4)   |
| C44 | 93(4)   | 101(5)  | 43(3)  | 22(3)    | 18(3)    | -11(3)  |
| C25 | 67(3)   | 113(5)  | 73(4)  | 19(3)    | 11(3)    | 35(3)   |
| C2  | 91(4)   | 85(4)   | 96(4)  | 27(4)    | 42(4)    | 7(4)    |
| C48 | 100(4)  | 94(4)   | 41(3)  | 12(3)    | 7(3)     | -3(4)   |
| C9  | 67(3)   | 106(5)  | 69(3)  | 25(3)    | 22(3)    | -15(3)  |
| C37 | 102(5)  | 96(5)   | 59(3)  | 22(3)    | 20(3)    | 17(4)   |
| C46 | 115(6)  | 131(6)  | 56(3)  | 38(4)    | 27(4)    | 3(5)    |
| C7  | 71(4)   | 114(5)  | 84(4)  | 36(4)    | 17(3)    | 18(4)   |
| C8  | 61(3)   | 131(7)  | 93(5)  | 31(4)    | 19(3)    | 3(4)    |
| C36 | 73(3)   | 94(4)   | 43(3)  | 2(3)     | 1(2)     | 17(3)   |
| C13 | 129(6)  | 63(4)   | 97(5)  | 24(3)    | 43(4)    | 11(4)   |
| C47 | 144(7)  | 101(5)  | 50(3)  | 27(3)    | -1(4)    | 3(5)    |
| C16 | 62(3)   | 62(3)   | 41(2)  | 14.9(19) | 14.3(19) | -9(2)   |
| C45 | 116(5)  | 127(6)  | 59(3)  | 28(4)    | 36(4)    | -14(5)  |
| C39 | 108(5)  | 153(8)  | 55(4)  | 3(4)     | -8(3)    | 21(5)   |
| C51 | 173(10) | 242(14) | 68(5)  | 40(6)    | 75(6)    | 42(9)   |
| C38 | 158(8)  | 160(8)  | 73(4)  | 64(5)    | 48(5)    | 66(7)   |
| C1  | 113(6)  | 118(7)  | 123(6) | 46(5)    | 52(5)    | 33(5)   |
| C14 | 145(8)  | 96(6)   | 140(7) | 41(5)    | 67(6)    | 50(6)   |
| C49 | 136(7)  | 166(9)  | 77(4)  | 42(5)    | 54(5)    | 56(6)   |
| C40 | 186(12) | 223(15) | 52(4)  | 28(6)    | -1(5)    | 65(11)  |
| C50 | 210(13) | 340(20) | 107(7) | 71(10)   | 77(9)    | 158(15) |
| C70 | 234(16) | 330(20) | 103(8) | 93(11)   | 38(9)    | 177(17) |
| C20 | 137(7)  | 162(9)  | 65(4)  | 31(5)    | 11(4)    | 45(7)   |
| C41 | 183(11) | 217(13) | 84(6)  | 78(7)    | -2(7)    | 57(10)  |
| C42 | 207(13) | 241(17) | 80(6)  | 85(9)    | 46(7)    | 112(12) |
| C52 | 238(16) | 380(30) | 114(9) | 96(13)   | 105(10)  | 159(19) |
| C55 | 186(12) | 300(20) | 125(9) | 72(11)   | 48(9)    | 120(14) |

**Table S4.** Bond Lengths for DPOTAB.

| Atom | Atom | Length/Å | Atom | Atom | Length/Å  |
|------|------|----------|------|------|-----------|
| C34  | C29  | 1.436(6) | C54  | C53  | 1.372(7)  |
| C34  | C21  | 1.409(7) | C54  | C57  | 1.390(8)  |
| C34  | C33  | 1.421(7) | C53  | C60  | 1.368(7)  |
| C29  | C28  | 1.367(7) | C12  | C3   | 1.442(7)  |
| C29  | C30  | 1.436(7) | C12  | C13  | 1.418(9)  |
| C21  | C15  | 1.500(5) | C3   | C2   | 1.431(9)  |
| C21  | C22  | 1.397(6) | C26  | C25  | 1.349(9)  |
| C28  | C27  | 1.395(7) | C59  | C60  | 1.382(7)  |
| C28  | O35  | 1.402(5) | C59  | C58  | 1.357(8)  |
| O52  | C11  | 1.394(6) | C57  | C58  | 1.351(9)  |
| O52  | C53  | 1.391(6) | C24  | C25  | 1.405(9)  |
| C15  | C18  | 1.389(6) | C44  | C45  | 1.426(8)  |
| C15  | C16  | 1.390(6) | C44  | C49  | 1.381(11) |
| C27  | C22  | 1.438(6) | C2   | C1   | 1.351(11) |
| C27  | C26  | 1.421(7) | C48  | C47  | 1.478(9)  |
| C22  | C23  | 1.422(7) | C48  | C20  | 1.346(12) |
| C4   | C5   | 1.413(7) | C9   | C8   | 1.336(11) |
| C4   | C17  | 1.490(6) | C37  | C36  | 1.345(10) |
| C4   | C3   | 1.394(8) | C37  | C38  | 1.351(9)  |
| O35  | C36  | 1.397(7) | C46  | C47  | 1.332(12) |
| C5   | C10  | 1.436(7) | C46  | C45  | 1.316(12) |
| C5   | C6   | 1.416(8) | C7   | C8   | 1.412(11) |
| C18  | C17  | 1.381(6) | C36  | C39  | 1.383(9)  |
| C33  | C32  | 1.358(8) | C13  | C14  | 1.357(12) |
| C17  | C56  | 1.387(6) | C47  | C41  | 1.466(14) |
| C43  | C19  | 1.487(6) | C45  | C51  | 1.498(14) |
| C43  | C44  | 1.423(9) | C39  | C40  | 1.353(16) |
| C43  | C48  | 1.396(9) | C51  | C52  | 1.336(18) |
| C10  | C11  | 1.381(9) | C38  | C42  | 1.423(17) |
| C10  | C9   | 1.438(8) | C1   | C14  | 1.396(13) |
| C11  | C12  | 1.397(9) | C49  | C50  | 1.383(14) |

|     |     |          |     |     |           |
|-----|-----|----------|-----|-----|-----------|
| C23 | C24 | 1.367(8) | C40 | C42 | 1.359(19) |
| C30 | C31 | 1.348(8) | C50 | C52 | 1.344(16) |
| C56 | C19 | 1.405(6) | C70 | C41 | 1.332(17) |
| C19 | C16 | 1.398(6) | C70 | C55 | 1.354(18) |
| C31 | C32 | 1.393(9) | C20 | C55 | 1.402(16) |
| C6  | C7  | 1.362(9) |     |     |           |

**Table S5.** Bond Angles for DPOTAB.

| <b>Atom Atom Atom</b> | <b>Angle/°</b> | <b>Atom Atom Atom</b> | <b>Angle/°</b> |
|-----------------------|----------------|-----------------------|----------------|
| C29 C34 C33           | 118.2(4)       | C54 C53 O52           | 114.7(4)       |
| C21 C34 C29           | 119.4(4)       | C60 C53 O52           | 123.8(4)       |
| C21 C34 C33           | 122.4(4)       | C60 C53 C54           | 121.5(4)       |
| C34 C29 C30           | 118.5(4)       | C11 C12 C3            | 117.1(5)       |
| C28 C29 C34           | 119.2(4)       | C11 C12 C13           | 122.6(6)       |
| C28 C29 C30           | 122.3(4)       | C13 C12 C3            | 120.3(6)       |
| C34 C21 C15           | 120.2(4)       | C4 C3 C12             | 121.1(5)       |
| C22 C21 C34           | 120.3(4)       | C4 C3 C2              | 122.4(5)       |
| C22 C21 C15           | 119.3(4)       | C12 C3 C2             | 116.5(5)       |
| C29 C28 C27           | 122.9(4)       | C25 C26 C27           | 120.4(5)       |
| C29 C28 O35           | 119.3(4)       | C58 C59 C60           | 121.1(5)       |
| C27 C28 O35           | 117.8(4)       | C58 C57 C54           | 120.6(5)       |
| C53 O52 C11           | 117.8(4)       | C53 C60 C59           | 118.2(5)       |
| C18 C15 C21           | 117.7(3)       | C57 C58 C59           | 120.1(5)       |
| C18 C15 C16           | 119.4(4)       | C23 C24 C25           | 120.6(5)       |
| C16 C15 C21           | 122.9(4)       | C45 C44 C43           | 117.8(7)       |
| C28 C27 C22           | 118.2(4)       | C49 C44 C43           | 122.6(5)       |
| C28 C27 C26           | 122.3(4)       | C49 C44 C45           | 119.6(7)       |
| C26 C27 C22           | 119.6(4)       | C26 C25 C24           | 120.9(5)       |
| C21 C22 C27           | 120.0(4)       | C1 C2 C3              | 121.1(7)       |
| C21 C22 C23           | 122.6(4)       | C43 C48 C47           | 117.2(7)       |
| C23 C22 C27           | 117.5(4)       | C20 C48 C43           | 122.6(6)       |
| C5 C4 C17             | 120.1(5)       | C20 C48 C47           | 120.3(7)       |
| C3 C4 C5              | 120.1(4)       | C8 C9 C10             | 121.7(6)       |
| C3 C4 C17             | 119.9(4)       | C38 C37 C36           | 124.1(7)       |
| C36 O35 C28           | 117.7(4)       | C45 C46 C47           | 120.4(6)       |
| C4 C5 C10             | 119.1(5)       | C6 C7 C8              | 120.2(7)       |
| C6 C5 C4              | 122.5(5)       | C9 C8 C7              | 120.6(6)       |
| C6 C5 C10             | 118.4(5)       | C37 C36 O35           | 125.2(5)       |
| C17 C18 C15           | 121.5(4)       | C37 C36 C39           | 119.7(7)       |
| C32 C33 C34           | 121.1(5)       | C39 C36 O35           | 115.1(7)       |

|     |     |     |          |     |     |     |           |
|-----|-----|-----|----------|-----|-----|-----|-----------|
| C18 | C17 | C4  | 120.9(4) | C14 | C13 | C12 | 119.9(7)  |
| C18 | C17 | C56 | 119.5(4) | C46 | C47 | C48 | 121.6(7)  |
| C56 | C17 | C4  | 119.6(4) | C46 | C47 | C41 | 123.3(8)  |
| C44 | C43 | C19 | 118.8(5) | C41 | C47 | C48 | 114.9(9)  |
| C48 | C43 | C19 | 121.3(5) | C15 | C16 | C19 | 119.8(4)  |
| C48 | C43 | C44 | 119.5(5) | C44 | C45 | C51 | 114.7(8)  |
| C11 | C10 | C5  | 119.3(5) | C46 | C45 | C44 | 123.3(7)  |
| C11 | C10 | C9  | 122.9(5) | C46 | C45 | C51 | 121.8(7)  |
| C9  | C10 | C5  | 117.7(6) | C40 | C39 | C36 | 118.6(11) |
| O52 | C11 | C12 | 118.4(6) | C52 | C51 | C45 | 121.6(8)  |
| C10 | C11 | O52 | 118.5(5) | C37 | C38 | C42 | 115.4(11) |
| C10 | C11 | C12 | 123.1(5) | C2  | C1  | C14 | 121.6(8)  |
| C24 | C23 | C22 | 121.0(5) | C13 | C14 | C1  | 120.6(8)  |
| C31 | C30 | C29 | 120.1(5) | C50 | C49 | C44 | 122.2(8)  |
| C17 | C56 | C19 | 119.9(4) | C39 | C40 | C42 | 121.3(10) |
| C56 | C19 | C43 | 117.5(4) | C49 | C50 | C52 | 120.2(12) |
| C16 | C19 | C43 | 122.7(4) | C55 | C70 | C41 | 121.1(10) |
| C16 | C19 | C56 | 119.8(4) | C48 | C20 | C55 | 120.4(9)  |
| C30 | C31 | C32 | 121.7(5) | C70 | C41 | C47 | 121.6(9)  |
| C7  | C6  | C5  | 121.4(6) | C40 | C42 | C38 | 120.7(9)  |
| C53 | C54 | C57 | 118.4(5) | C51 | C52 | C50 | 121.3(11) |
| C33 | C32 | C31 | 120.5(5) | C70 | C55 | C20 | 121.7(12) |



**Table S6.** Torsion Angles for DPOTAB.

| <b>A</b> | <b>B</b> | <b>C</b> | <b>D</b> | <b>Angle/°</b> | <b>A</b> | <b>B</b> | <b>C</b> | <b>D</b> | <b>Angle/°</b> |
|----------|----------|----------|----------|----------------|----------|----------|----------|----------|----------------|
| C34      | C29      | C28      | C27      | -1.8(6)        | C10      | C9       | C8       | C7       | -0.7(10)       |
| C34      | C29      | C28      | O35      | 179.7(4)       | C11      | O52      | C53      | C54      | 174.3(5)       |
| C34      | C29      | C30      | C31      | 0.0(7)         | C11      | O52      | C53      | C60      | -5.2(8)        |
| C34      | C21      | C15      | C18      | 85.0(5)        | C11      | C10      | C9       | C8       | 179.9(5)       |
| C34      | C21      | C15      | C16      | -93.8(5)       | C11      | C12      | C3       | C4       | -2.0(7)        |
| C34      | C21      | C22      | C27      | -3.8(6)        | C11      | C12      | C3       | C2       | -179.5(5)      |
| C34      | C21      | C22      | C23      | 177.3(4)       | C11      | C12      | C13      | C14      | -178.9(6)      |
| C34      | C33      | C32      | C31      | 0.9(9)         | C23      | C24      | C25      | C26      | 1.1(11)        |
| C29      | C34      | C21      | C15      | -171.3(4)      | C30      | C29      | C28      | C27      | 179.1(4)       |
| C29      | C34      | C21      | C22      | 3.3(6)         | C30      | C29      | C28      | O35      | 0.6(6)         |
| C29      | C34      | C33      | C32      | -0.9(7)        | C30      | C31      | C32      | C33      | -0.5(9)        |
| C29      | C28      | C27      | C22      | 1.3(7)         | C56      | C19      | C16      | C15      | -3.6(8)        |
| C29      | C28      | C27      | C26      | -179.1(5)      | C19      | C43      | C44      | C45      | -177.6(5)      |
| C29      | C28      | O35      | C36      | -97.4(5)       | C19      | C43      | C44      | C49      | 2.9(10)        |
| C29      | C30      | C31      | C32      | 0.1(9)         | C19      | C43      | C48      | C47      | 177.7(6)       |
| C21      | C34      | C29      | C28      | -0.6(6)        | C19      | C43      | C48      | C20      | -2.5(11)       |
| C21      | C34      | C29      | C30      | 178.6(4)       | C6       | C5       | C10      | C11      | -178.8(4)      |
| C21      | C34      | C33      | C32      | -179.0(5)      | C6       | C5       | C10      | C9       | 2.1(6)         |
| C21      | C15      | C18      | C17      | 179.9(4)       | C6       | C7       | C8       | C9       | 1.4(10)        |
| C21      | C15      | C16      | C19      | -178.3(4)      | C54      | C53      | C60      | C59      | -0.2(9)        |
| C21      | C22      | C23      | C24      | 179.0(5)       | C54      | C57      | C58      | C59      | 1.5(10)        |
| C28      | C29      | C30      | C31      | 179.1(5)       | C53      | O52      | C11      | C10      | 96.2(6)        |
| C28      | C27      | C22      | C21      | 1.5(6)         | C53      | O52      | C11      | C12      | -85.0(6)       |
| C28      | C27      | C22      | C23      | -179.6(4)      | C53      | C54      | C57      | C58      | -1.3(10)       |
| C28      | C27      | C26      | C25      | 179.5(5)       | C12      | C3       | C2       | C1       | -1.2(9)        |
| C28      | O35      | C36      | C37      | 12.2(8)        | C12      | C13      | C14      | C1       | -1.8(13)       |
| C28      | O35      | C36      | C39      | -167.8(5)      | C3       | C4       | C5       | C10      | -3.6(6)        |
| O52      | C11      | C12      | C3       | -178.6(4)      | C3       | C4       | C5       | C6       | 177.0(4)       |
| O52      | C11      | C12      | C13      | -0.1(8)        | C3       | C4       | C17      | C18      | 91.2(6)        |
| O52      | C53      | C60      | C59      | 179.2(5)       | C3       | C4       | C17      | C56      | -89.7(6)       |
| C15      | C21      | C22      | C27      | 170.9(4)       | C3       | C12      | C13      | C14      | -0.4(10)       |

|                 |           |                 |            |
|-----------------|-----------|-----------------|------------|
| C15 C21 C22 C23 | -8.0(6)   | C3 C2 C1 C14    | -1.0(13)   |
| C15 C18 C17 C4  | 179.2(5)  | C26 C27 C22 C21 | -178.1(4)  |
| C15 C18 C17 C56 | 0.1(8)    | C26 C27 C22 C23 | 0.8(7)     |
| C27 C28 O35 C36 | 84.0(5)   | C57 C54 C53 O52 | -178.9(6)  |
| C27 C22 C23 C24 | 0.2(8)    | C57 C54 C53 C60 | 0.6(9)     |
| C27 C26 C25 C24 | -0.1(11)  | C60 C59 C58 C57 | -1.1(9)    |
| C22 C21 C15 C18 | -89.7(5)  | C58 C59 C60 C53 | 0.5(8)     |
| C22 C21 C15 C16 | 91.5(6)   | C44 C43 C19 C56 | 84.2(7)    |
| C22 C27 C26 C25 | -0.8(8)   | C44 C43 C19 C16 | -96.4(7)   |
| C22 C23 C24 C25 | -1.1(10)  | C44 C43 C48 C47 | 4.6(9)     |
| C4 C5 C10 C11   | 1.9(6)    | C44 C43 C48 C20 | -175.6(7)  |
| C4 C5 C10 C9    | -177.2(4) | C44 C45 C51 C52 | -1.6(19)   |
| C4 C5 C6 C7     | 177.8(5)  | C44 C49 C50 C52 | 4(3)       |
| C4 C17 C56 C19  | -179.8(5) | C2 C1 C14 C13   | 2.6(15)    |
| C4 C3 C2 C1     | -178.8(6) | C48 C43 C19 C56 | -89.0(7)   |
| O35 C28 C27 C22 | 179.8(4)  | C48 C43 C19 C16 | 90.4(7)    |
| O35 C28 C27 C26 | -0.6(7)   | C48 C43 C44 C45 | -4.3(9)    |
| O35 C36 C39 C40 | -179.6(8) | C48 C43 C44 C49 | 176.2(7)   |
| C5 C4 C17 C18   | -89.4(6)  | C48 C47 C41 C70 | 1(2)       |
| C5 C4 C17 C56   | 89.6(6)   | C48 C20 C55 C70 | -2(3)      |
| C5 C4 C3 C12    | 3.7(7)    | C9 C10 C11 O52  | -2.4(7)    |
| C5 C4 C3 C2     | -178.9(4) | C9 C10 C11 C12  | 178.9(4)   |
| C5 C10 C11 O52  | 178.6(4)  | C37 C36 C39 C40 | 0.4(12)    |
| C5 C10 C11 C12  | -0.2(7)   | C37 C38 C42 C40 | -2.7(17)   |
| C5 C10 C9 C8    | -1.1(8)   | C46 C47 C41 C70 | -174.7(14) |
| C5 C6 C7 C8     | -0.3(9)   | C46 C45 C51 C52 | 174.1(15)  |
| C18 C15 C16 C19 | 2.9(7)    | C36 C37 C38 C42 | 2.4(12)    |
| C18 C17 C56 C19 | -0.7(8)   | C36 C39 C40 C42 | -0.8(18)   |
| C33 C34 C29 C28 | -178.7(4) | C13 C12 C3 C4   | 179.5(5)   |
| C33 C34 C29 C30 | 0.4(6)    | C13 C12 C3 C2   | 1.9(8)     |
| C33 C34 C21 C15 | 6.8(6)    | C47 C48 C20 C55 | -0.4(17)   |
| C33 C34 C21 C22 | -178.6(4) | C47 C46 C45 C44 | -2.6(13)   |
| C17 C4 C5 C10   | 177.0(4)  | C47 C46 C45 C51 | -178.0(9)  |

|                 |           |                 |           |
|-----------------|-----------|-----------------|-----------|
| C17 C4 C5 C6    | -2.3(6)   | C16 C15 C18 C17 | -1.2(7)   |
| C17 C4 C3 C12   | -176.9(4) | C45 C44 C49 C50 | 0.6(17)   |
| C17 C4 C3 C2    | 0.5(7)    | C45 C46 C47 C48 | 2.9(13)   |
| C17 C56 C19 C43 | -178.1(5) | C45 C46 C47 C41 | 178.0(10) |
| C17 C56 C19 C16 | 2.5(8)    | C45 C51 C52 C50 | 6(3)      |
| C43 C19 C16 C15 | 177.0(5)  | C39 C40 C42 C38 | 2(2)      |
| C43 C44 C45 C46 | 3.3(11)   | C38 C37 C36 O35 | 178.7(6)  |
| C43 C44 C45 C51 | 179.0(7)  | C38 C37 C36 C39 | -1.3(11)  |
| C43 C44 C49 C50 | 180.0(12) | C49 C44 C45 C46 | -177.2(8) |
| C43 C48 C47 C46 | -3.9(11)  | C49 C44 C45 C51 | -1.6(12)  |
| C43 C48 C47 C41 | -179.4(8) | C49 C50 C52 C51 | -7(3)     |
| C43 C48 C20 C55 | 179.8(11) | C20 C48 C47 C46 | 176.3(9)  |
| C10 C5 C6 C7    | -1.5(7)   | C20 C48 C47 C41 | 0.8(13)   |
| C10 C11 C12 C3  | 0.2(7)    | C41 C70 C55 C20 | 3(3)      |
| C10 C11 C12 C13 | 178.7(5)  | C55 C70 C41 C47 | -3(3)     |

**Table S7.** Hydrogen Atom Coordinates ( $\text{\AA}\times 10^4$ ) and Isotropic Displacement Parameters ( $\text{\AA}^2\times 10^3$ ) for DPOTAB.

| Atom | x        | y       | z        | U(eq) |
|------|----------|---------|----------|-------|
| H18  | 2373.28  | 3149.91 | 1091.57  | 64    |
| H33  | 3240.08  | 1265.95 | 1251.84  | 74    |
| H23  | -673.69  | 2693.31 | 1341.22  | 80    |
| H30  | 1127.93  | -352.13 | -1531.48 | 78    |
| H56  | 3510.42  | 3889.82 | 3641.91  | 73    |
| H31  | 3160.91  | -512.76 | -864.18  | 91    |
| H6   | 5329.34  | 3221.43 | 2430.77  | 84    |
| H54  | 7059.71  | 7955.09 | 2018.04  | 91    |
| H32  | 4210.84  | 277.37  | 520.89   | 92    |
| H26  | -2705.77 | 1092.54 | -1462.76 | 88    |
| H59  | 4679.03  | 6076.21 | -546.11  | 81    |
| H57  | 6910.58  | 8301.89 | 743.09   | 106   |
| H60  | 4776.18  | 5707.58 | 706.14   | 78    |
| H58  | 5770.51  | 7349.27 | -521.65  | 95    |
| H24  | -2740.55 | 2823.87 | 665.19   | 105   |
| H25  | -3736.1  | 2037.79 | -741.99  | 103   |
| H2   | 1477.56  | 4740.97 | 2398.73  | 106   |
| H9   | 7682.38  | 5646.75 | 2228.01  | 98    |
| H37  | 400.38   | 1614.86 | -1775.01 | 103   |
| H46  | 2271.17  | 2528.3  | 6177.08  | 119   |
| H7   | 7424.38  | 3236.75 | 2381.84  | 107   |
| H8   | 8584.09  | 4454.32 | 2252.94  | 116   |
| H13  | 3916.73  | 7194.3  | 2290.03  | 113   |
| H16  | 1163.21  | 1626.28 | 2375.13  | 68    |
| H39  | -2336.55 | -317.44 | -3277.78 | 139   |
| H51  | 423.61   | 3337.11 | 6136.21  | 184   |
| H38  | 484.73   | 2173.82 | -2878.49 | 143   |
| H1   | 613.06   | 5954.83 | 2372.97  | 134   |
| H14  | 1834.85  | 7192.82 | 2370.9   | 142   |
| H49  | 472.31   | 3526.31 | 3471.65  | 142   |

|     |          |         |          |     |
|-----|----------|---------|----------|-----|
| H40 | -2337.82 | 223.34  | -4404.43 | 192 |
| H50 | -990.81  | 4126.2  | 4121.84  | 245 |
| H70 | 5673.8   | 1218.78 | 5666.35  | 253 |
| H20 | 4155.14  | 1926.72 | 3565.82  | 148 |
| H41 | 4130.48  | 1703.2  | 6247.51  | 193 |
| H42 | -1024.81 | 1465.75 | -4228.24 | 195 |
| H52 | -837.94  | 4148.44 | 5490.21  | 266 |
| H55 | 5645.83  | 1259.54 | 4330.62  | 233 |

**Table S8.** Spin-orbit coupling matrix elements

| <b>SOC</b>                                         | <b>DPOTAB</b>          | <b>DPOTABCN</b>        |
|----------------------------------------------------|------------------------|------------------------|
| $\langle S_1   \hat{H}_{\text{SOC}}   T_1 \rangle$ | 0.062 cm <sup>-1</sup> | 0.088 cm <sup>-1</sup> |
| $\langle S_1   \hat{H}_{\text{SOC}}   T_2 \rangle$ | 0.162 cm <sup>-1</sup> | 0.345 cm <sup>-1</sup> |
| $\langle S_1   \hat{H}_{\text{SOC}}   T_3 \rangle$ | 0.301 cm <sup>-1</sup> | 0.145 cm <sup>-1</sup> |
| $\langle S_1   \hat{H}_{\text{SOC}}   T_4 \rangle$ | 0.080 cm <sup>-1</sup> | 0.016 cm <sup>-1</sup> |
| $\langle S_1   \hat{H}_{\text{SOC}}   T_5 \rangle$ | 0.332 cm <sup>-1</sup> | 0.272 cm <sup>-1</sup> |
| $\langle S_1   \hat{H}_{\text{SOC}}   T_6 \rangle$ | 0.128 cm <sup>-1</sup> | 0.176 cm <sup>-1</sup> |

### Thermal and electronic characterization

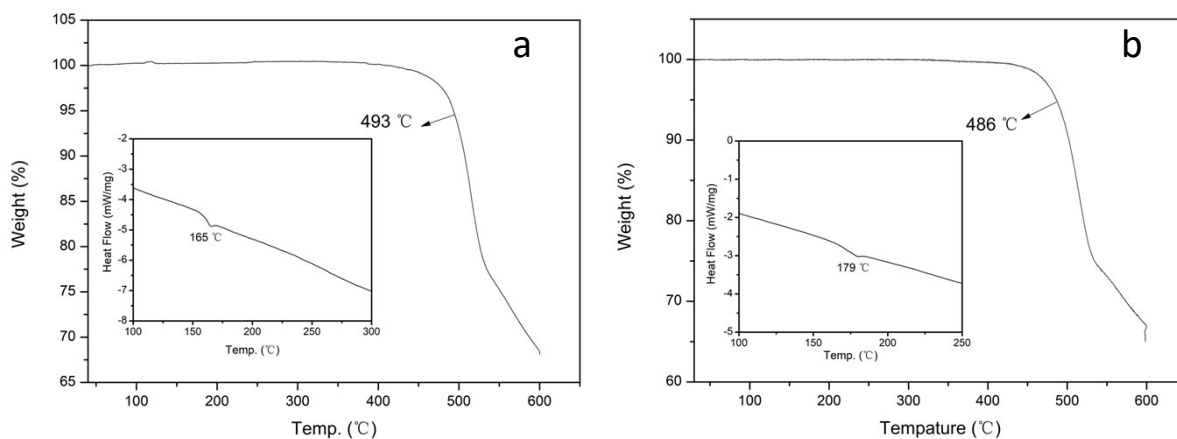

**Figure S2.** Thermal analysis of (a) DPOTAB and (b) DPOTABCN measured using TGA and DSC.

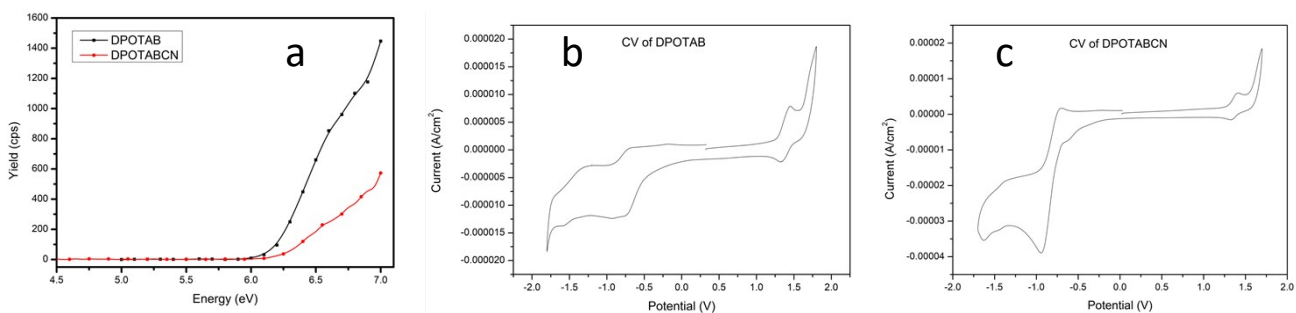

**Figure S3.** Ionization potential analysis of DPOTAB and DPOTABCN measured using photoelectron spectroscopy (a), and cyclic voltammetry of DPOTAB (b) and DPOTABCN (c).

### ***PLQE calculations***

UV-visible absorption and PL emission spectra were recorded for cyclohexane solutions at room temperature in a cuvette having a 10 mm path length. The excitation wavelength for PL emission spectra was 372 nm. The PL (fluorescence in this case) quantum yields of DPOTAB and DPOTABCN were calculated using a solution of the 9,10-DPA standard having a known fluorescence quantum yield, according to the equation (subscripts X and ST denote sample and standard, respectively)

$$\Phi_X = \Phi_{ST} (M_X/M_{ST}) (\eta^2 X / \eta^2 ST)$$

where  $\Phi$  is the fluorescence quantum yield (fluorescence quantum *efficiency* is  $\Phi$  stated as a percentage),  $M$  is the slope of the best-fit straight line in a plot of integrated fluorescence intensity as a function of the fraction of light absorbed by the fluorescing species at the excitation wavelength, and  $\eta$  the refractive index of the solvent. For solutions having an absorbances up to around 0.1 at the excitation wavelength, such as in the present work, absorbance values can be used in the calculation of  $M$  instead of the fraction of light absorbed. The literature values for the fluorescence quantum yield of 9,10-DPA,  $\Phi_{ST}$ , in cyclohexane solution with and without de-oxygenation are 0.91 and 0.70, respectively.<sup>1</sup> In the present work, solution de-oxygenation of was achieved by bubbling with N<sub>2</sub> gas.

From the results shown in **Figure S4**, the room-temperature fluorescence quantum yield/efficiency of **DPOTAB** in cyclohexane at room temperature is obtained as follows:

$$\text{Air-equilibrated: } \Phi_{\text{DPOTAB}} = 0.70 \times (182.81 \div 188.02) = 0.68 \text{ (PLQE = 68\%)}$$

$$\text{De-oxygenated: } \Phi_{\text{DPOTAB}} = 0.91 \times (197.34 \div 198.45) = 0.90 \text{ (PLQE = 90\%)}$$

From the results shown in **Figure S5**, the fluorescence quantum yield/efficiency of **DPOTABCN** in cyclohexane at room temperature is obtained as follows:

$$\text{Air-equilibrated: } \Phi_{\text{DPOTABCN}} = 0.70 \times (246,486.873 \div 287,295.068) = 0.60 \text{ (PLQE = 60\%)}$$

$$\text{De-oxygenated: } \Phi_{\text{DPOTABCN}} = 0.91 \times (257,204.948 \div 309,224.028) = 0.76 \text{ (PLQE = 76\%)}$$

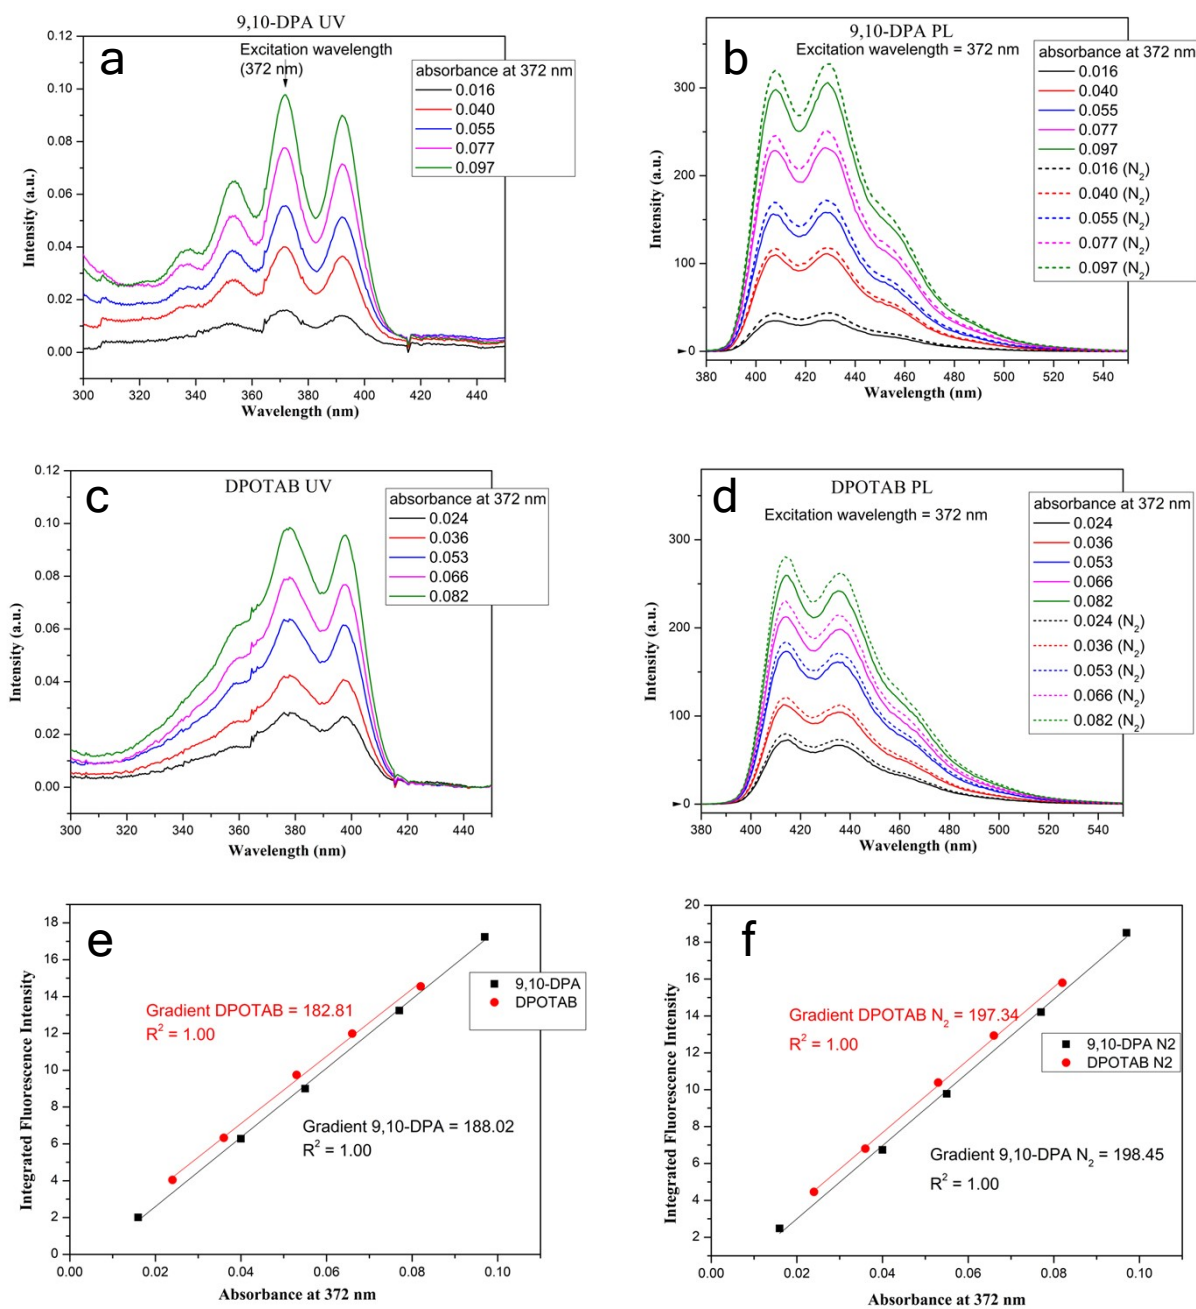

**Figure S4.** Calculation of PL quantum yield of DPOTAB in cyclohexane solution: (a) UV absorption of 9,10-DPA, (b) PL of 9,10-DPA excited at 372 nm without and with  $N_2$  bubbling, (c) UV absorption of DPOTAB, (d) PL of DPOTAB excited at 372 nm without and with  $N_2$  bubbling, (e) Calibration curves of integrated fluorescence intensity (area) as a function of absorbance for 9,10-DPA and DPOTAB without  $N_2$  bubbling, (f) Calibration curves of integrated fluorescence intensity (area) as a function of absorbance for 9,10-DPA and DPOTAB with  $N_2$  bubbling.



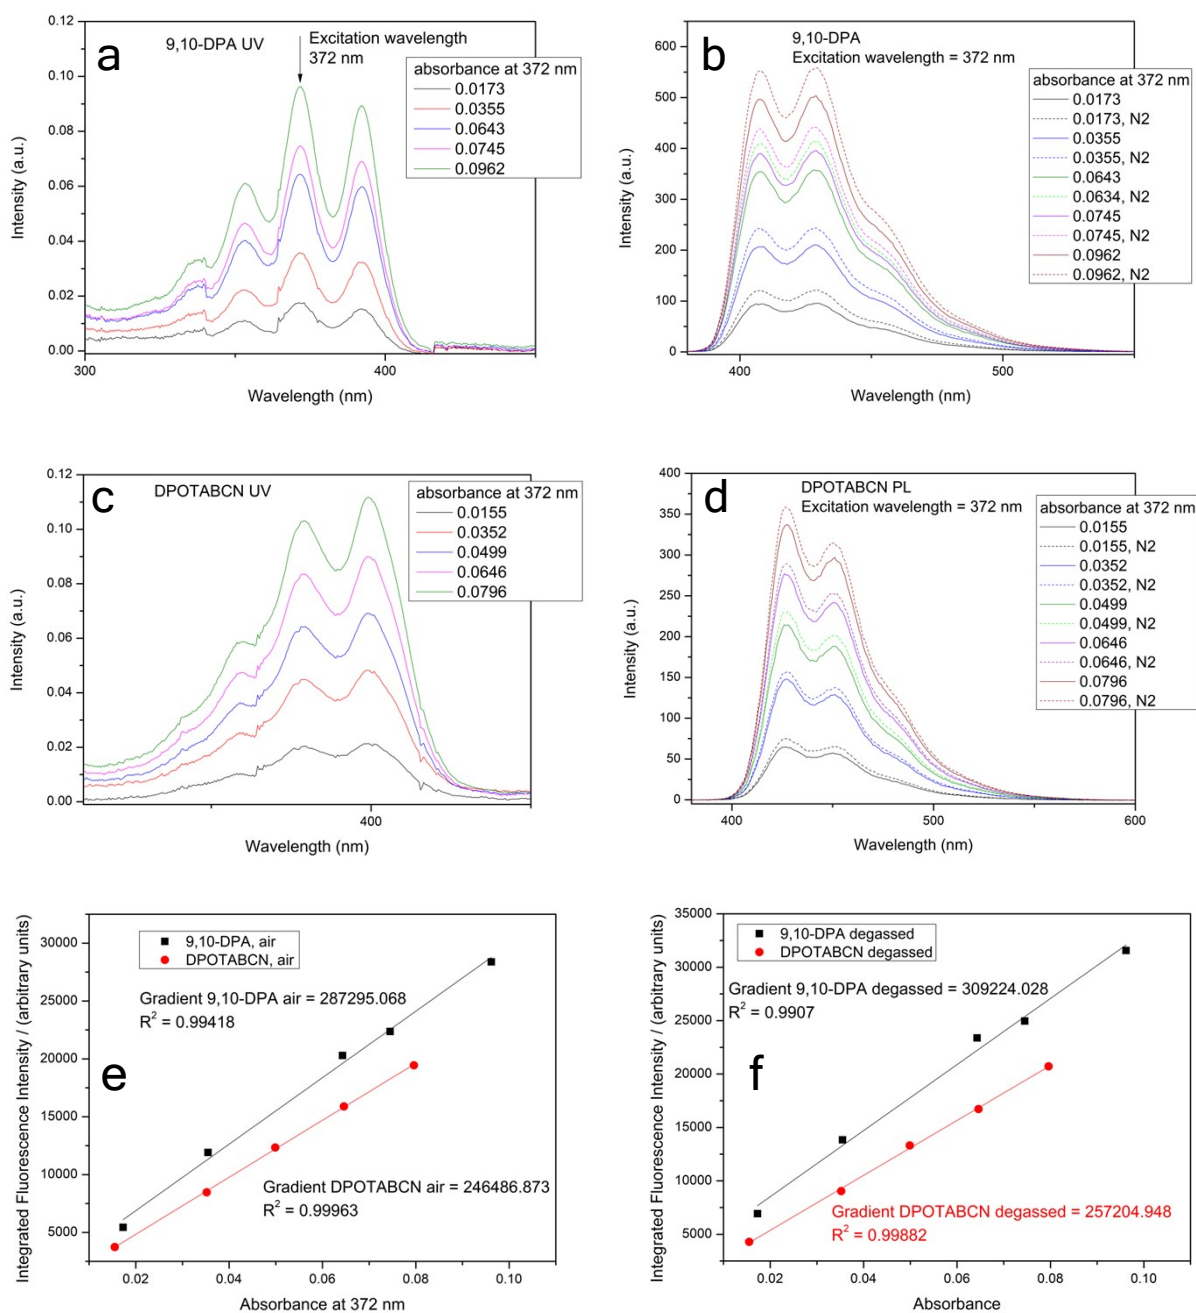

**Figure S5.** Calculation of PL quantum yield of DPOTABCN in cyclohexane solution: (a) UV absorption of 9,10-DPA, (b) PL of 9,10-DPA excited at 372 nm without and with N<sub>2</sub> bubbling, (c) UV absorption of DPOTABCN, (d) PL of DPOTABCN excited at 372 nm without and with N<sub>2</sub> bubbling, (e) Calibration curves of integrated fluorescence intensity (area) as a function of absorbance for 9,10-DPA and DPOTABCN without N<sub>2</sub> bubbling, (f) Calibration curves of integrated fluorescence intensity (area) as a function of absorbance for 9,10-DPA and DPOTABCN with N<sub>2</sub> bubbling.

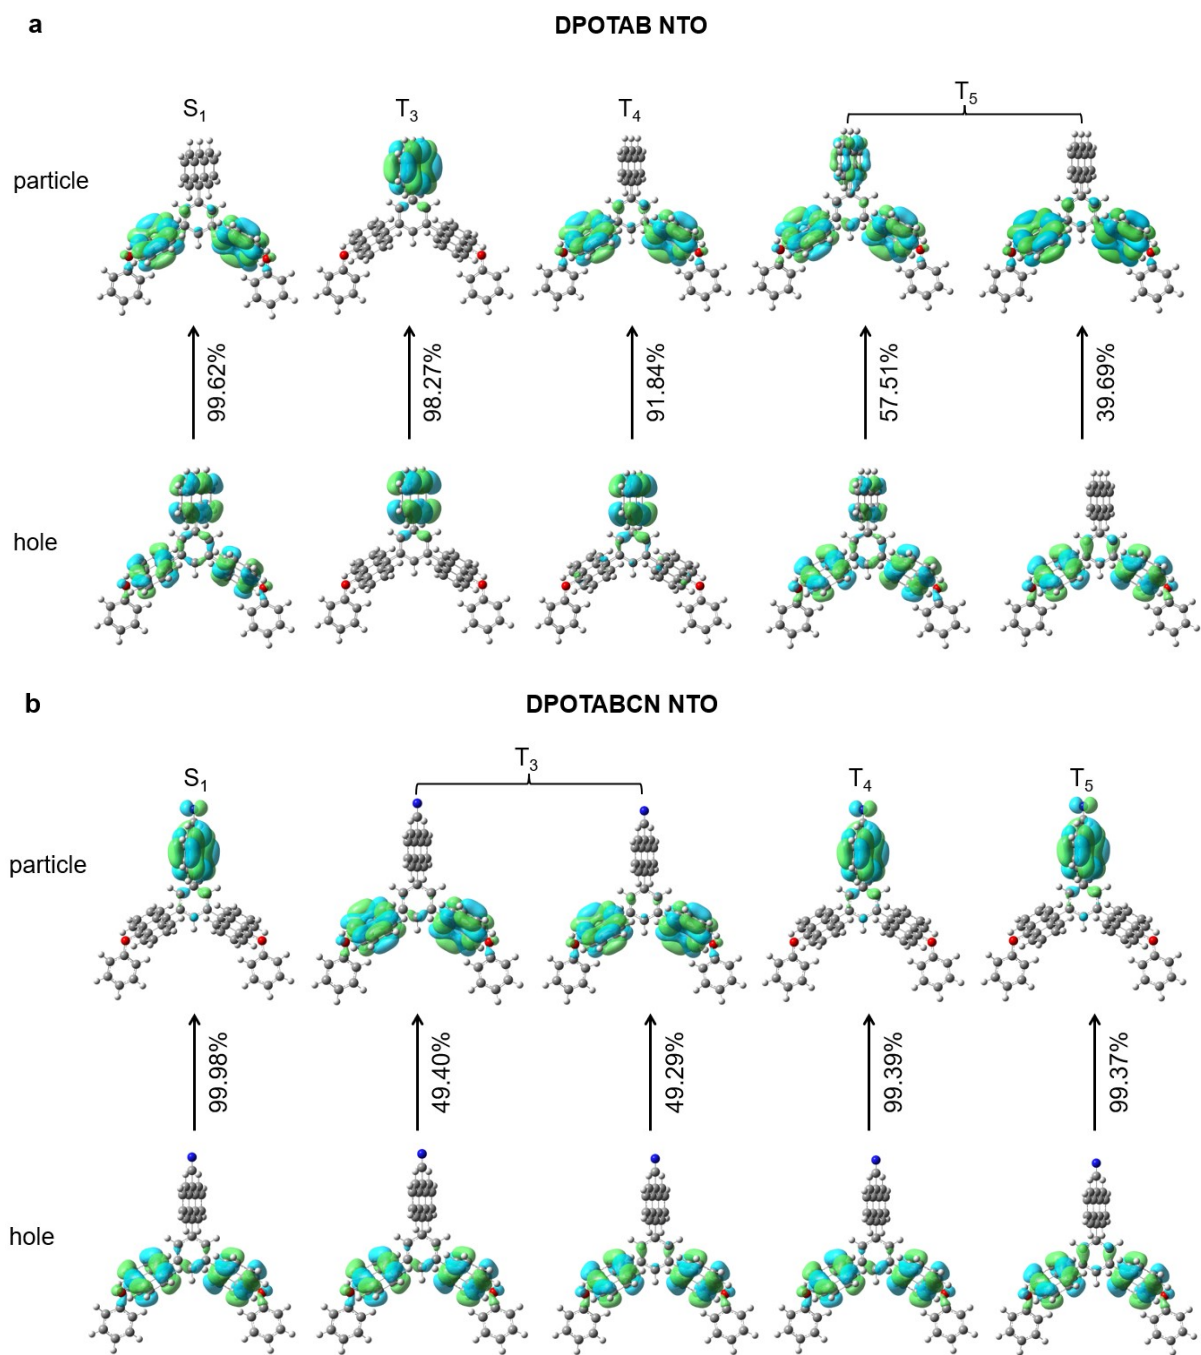

**Figure S6.** Calculated NTOs of (a) DPOTAB and (b) DPOTABCN.

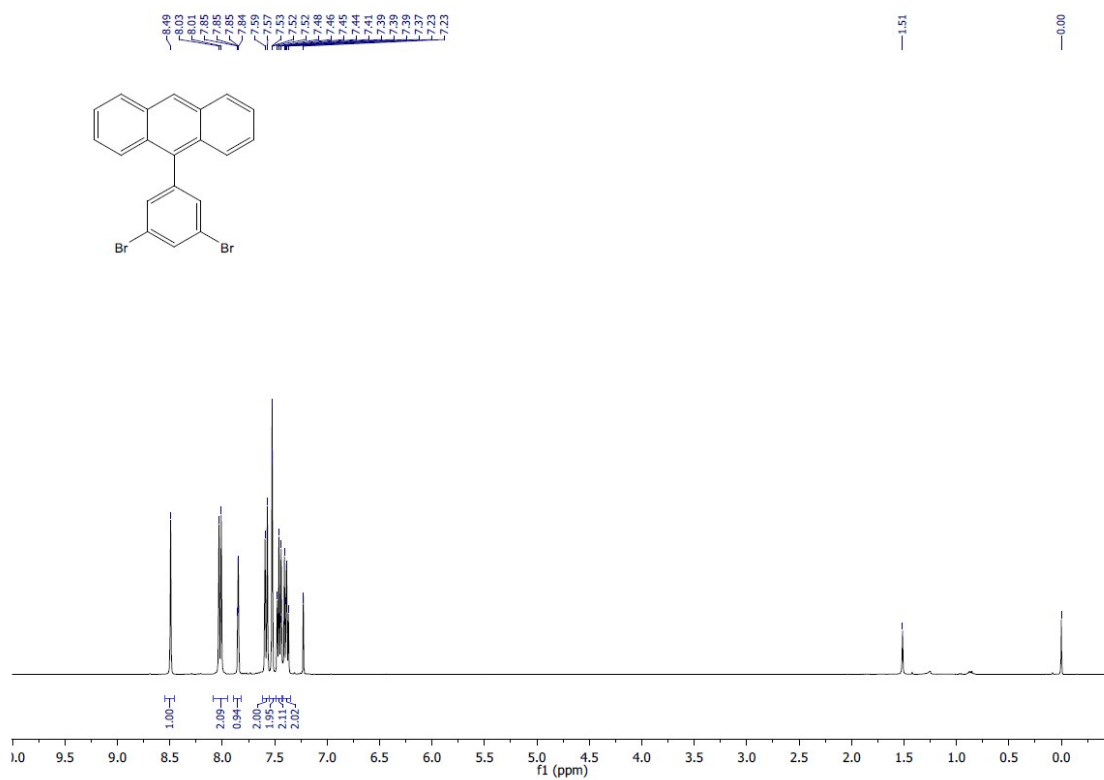

**Fig. S7.** <sup>1</sup>H NMR spectrum of compound 1.

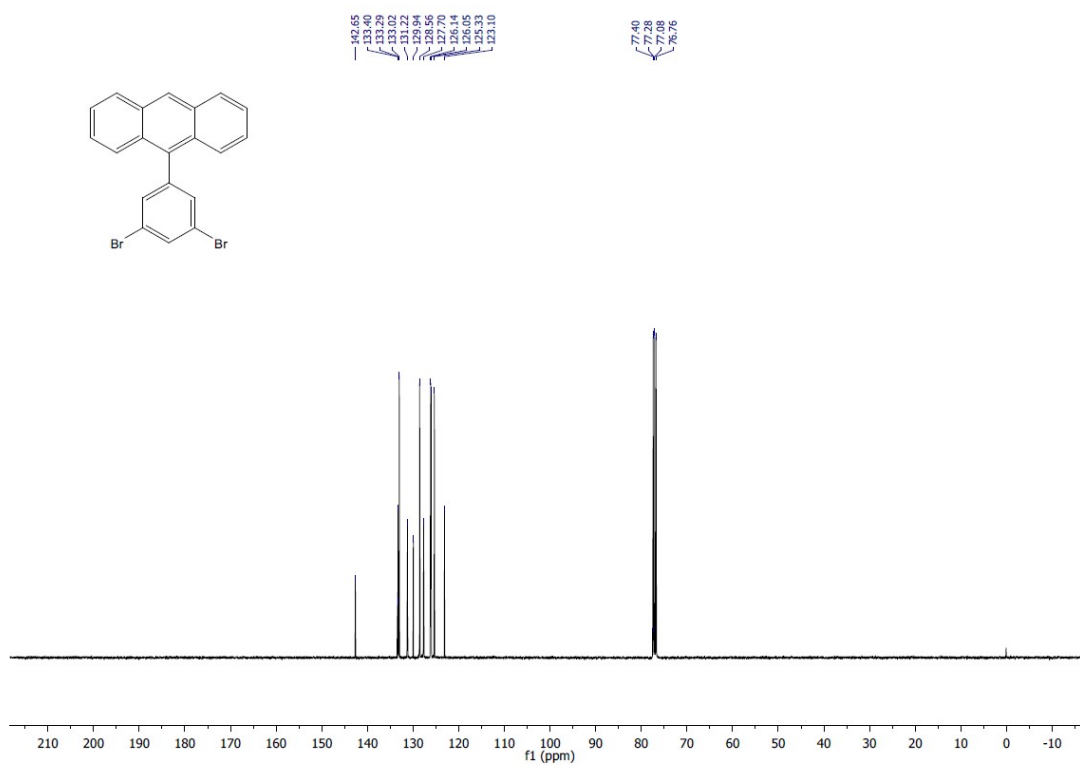

**Fig. S8.** <sup>13</sup>C NMR spectrum of compound 1.

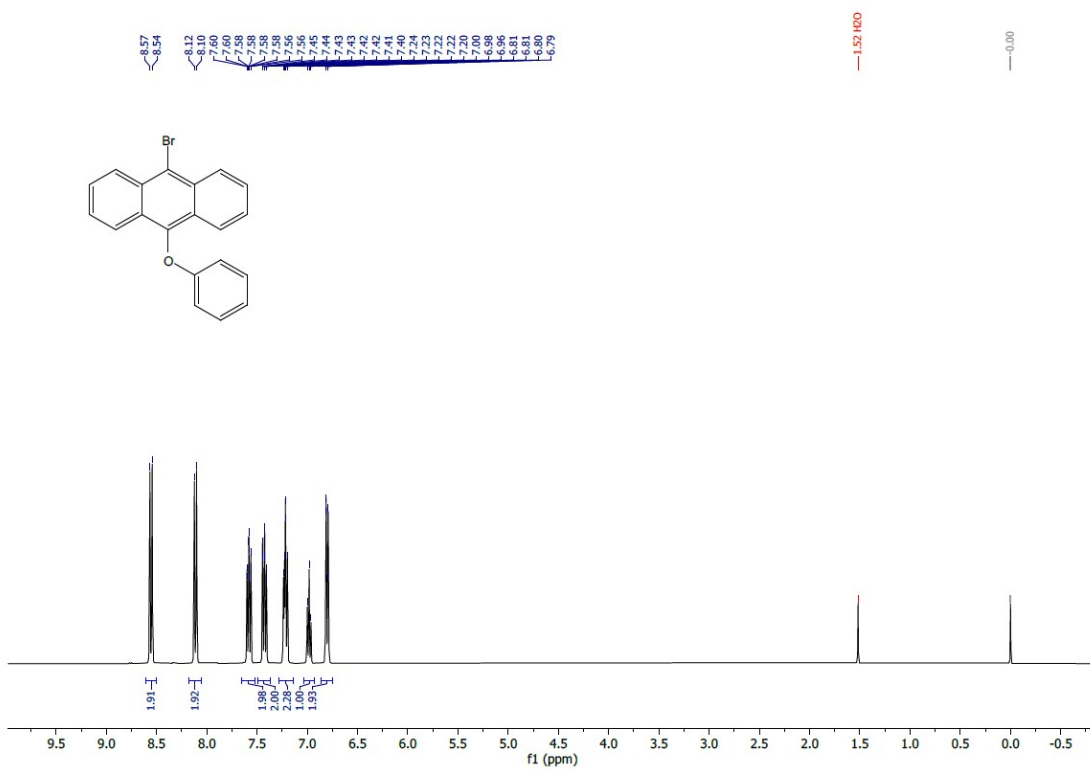

Fig. S9. <sup>1</sup>H NMR spectrum of compound 2.

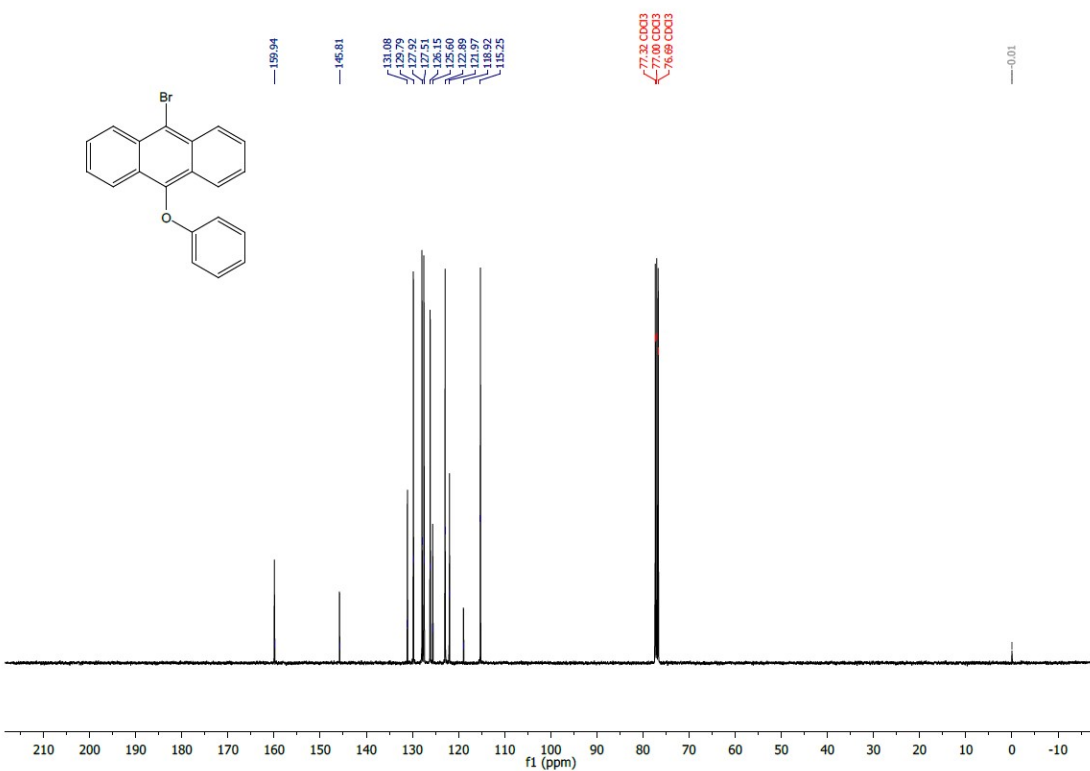

Fig. S10. <sup>13</sup>C NMR spectrum of compound 2.

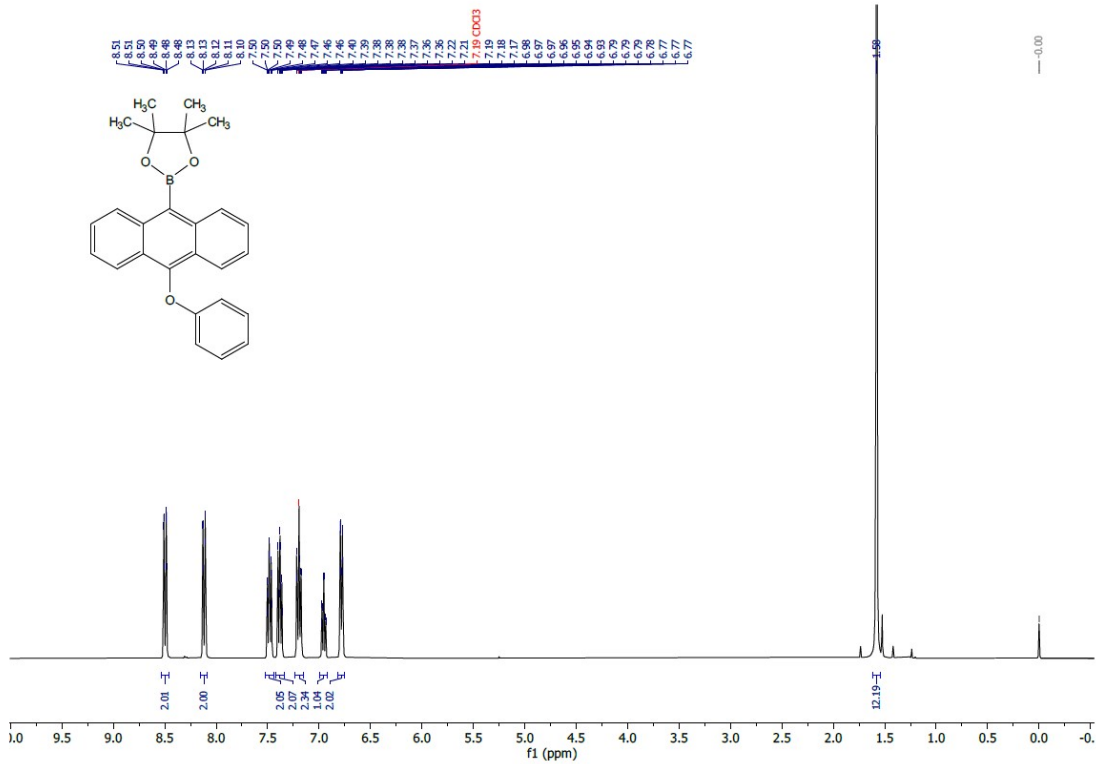

Fig. S11. <sup>1</sup>H NMR spectrum of compound 3.

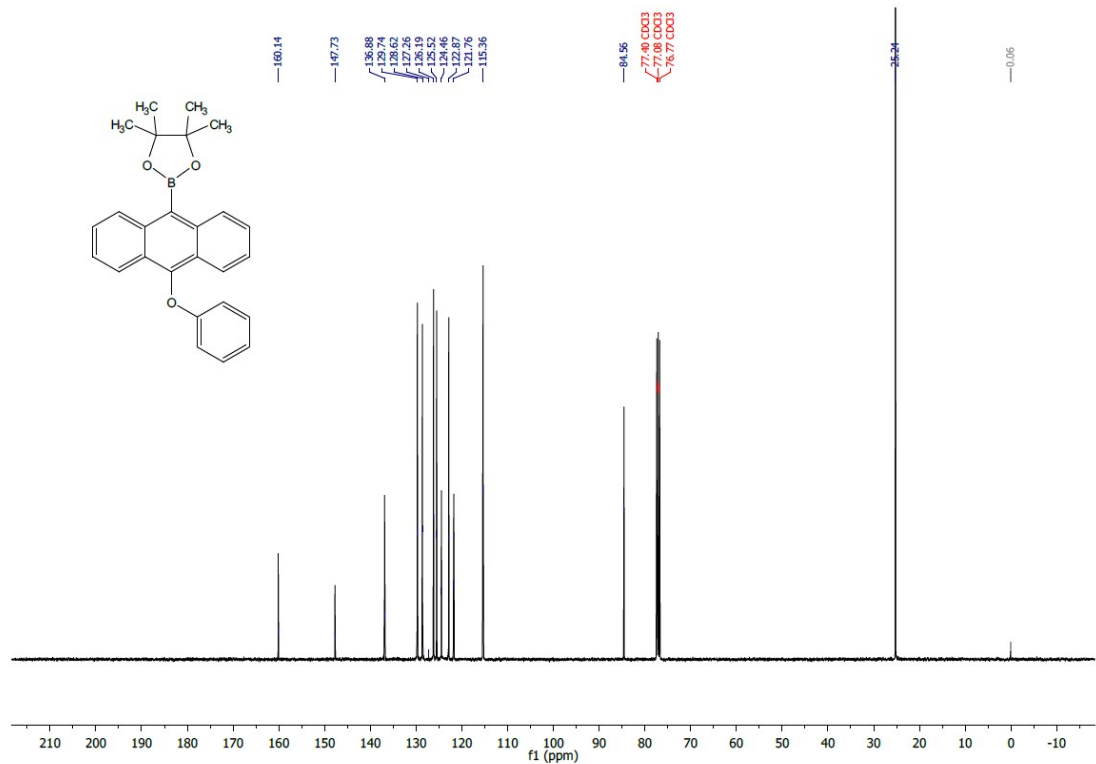

Fig. S12. <sup>13</sup>C NMR spectrum of compound 3.

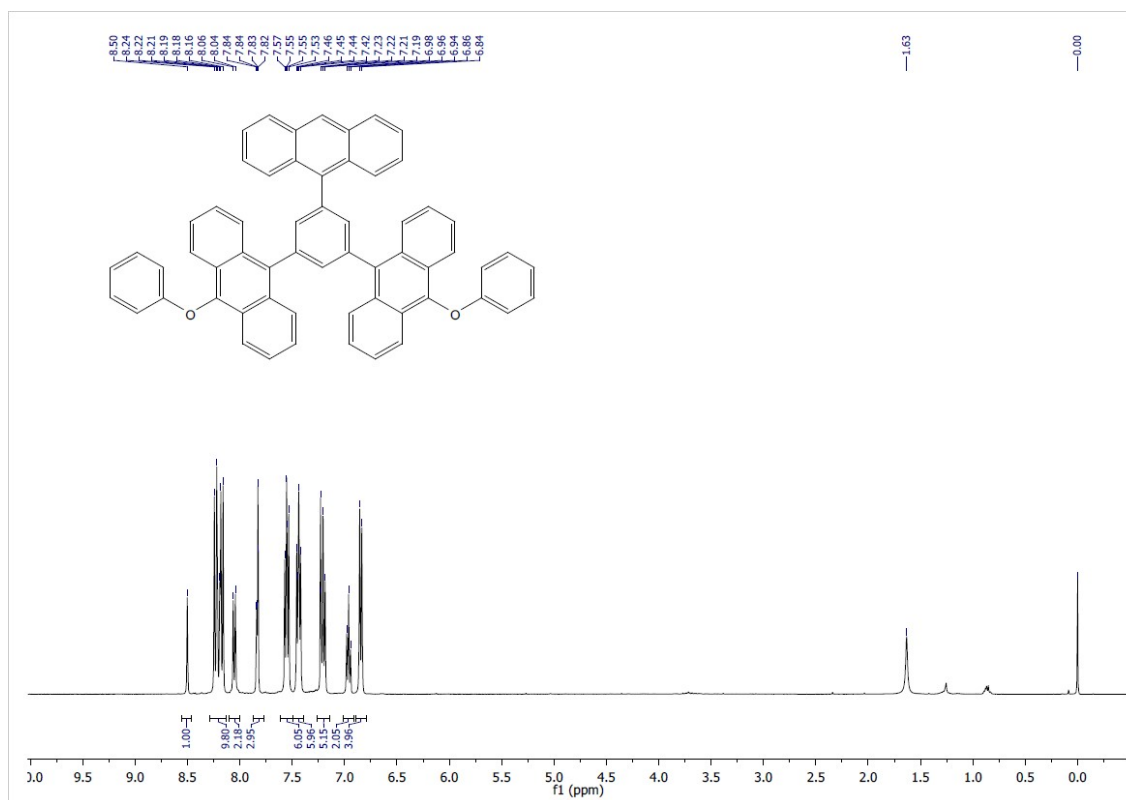

Fig. S13. <sup>1</sup>H NMR spectrum of compound DPOTAB.

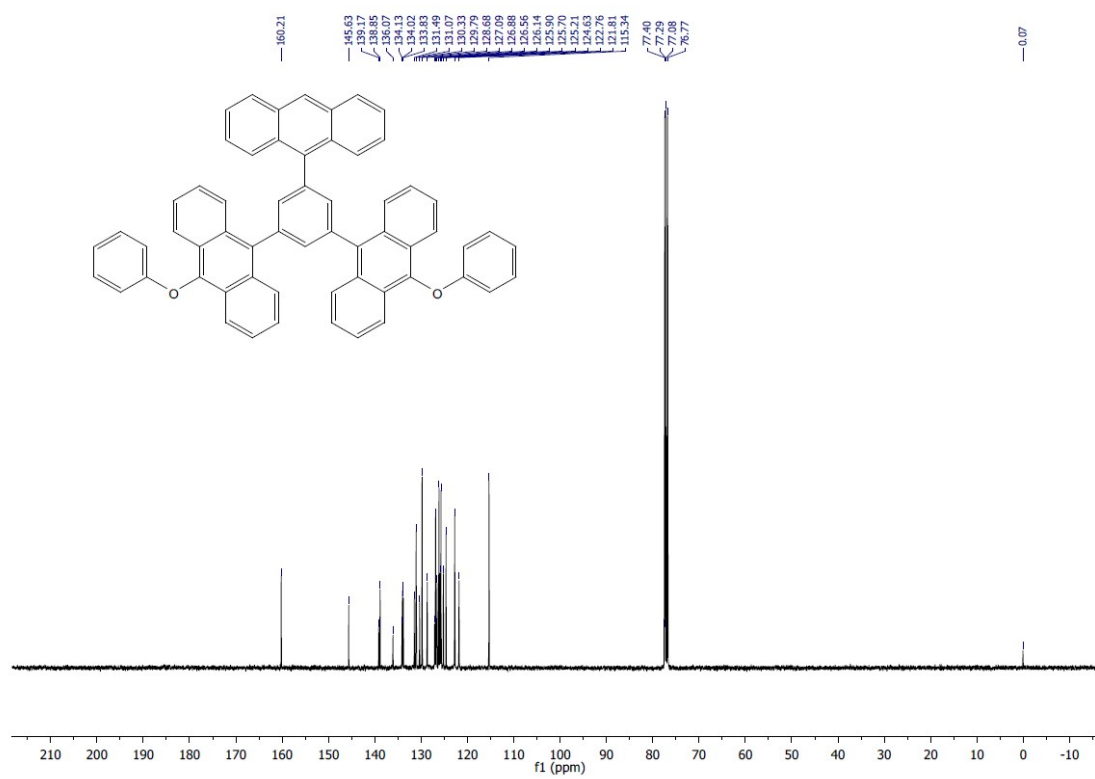

Fig. S14. <sup>13</sup>C NMR spectrum of compound DPOTAB.







## References

- (1) Rurack, K., Fluorescence Quantum Yields: Methods of Determination and Standards. In *Standardization and Quality Assurance in Fluorescence Measurements I: Techniques*, Resch-Genger, U., Ed. Springer Berlin Heidelberg: Berlin, Heidelberg, 2008; pp 101-145.
